# Supplementary material for: Diclofenac Potassium in Acute Postoperative Pain and Dysmenorrhoea: Results from Comprehensive Clinical Trial Reports
Source: Hindawi journal article supplement (doi:10.1155/2018/9493413), 2018-01-01
Supplement: f1 [file 9493413.f1.pdf]

## Appendix 1: Clinical study reports and linked publications

| Clinical study reports (CSRs) | Title and lead investigator                                                                                                                                                                                                                                           | Linked publications                                                                                                                                                              |
|-------------------------------|-----------------------------------------------------------------------------------------------------------------------------------------------------------------------------------------------------------------------------------------------------------------------|----------------------------------------------------------------------------------------------------------------------------------------------------------------------------------|
| <b>CSR 02</b>                 | A double-blind study comparing the safety and efficacy of diclofenac potassium, aspirin, or placebo in the treatment of moderate or severe pain secondary to dental impaction surgery. Report date January 15 1991. Lead investigator S Nelson, Columbia, MD, USA.    | Nelson S, Brahim J. An evaluation of the analgesic efficacy of diclofenac potassium, aspirin, and placebo in postoperative dental pain. Today's Therapeutic Trends 1994;12:3–14. |
| <b>CSR 03</b>                 | A double-blind study comparing the safety and efficacy of diclofenac potassium, aspirin, or placebo in the treatment of moderate or severe pain secondary to dental impaction surgery. Report date February 11 1991. Lead investigator SA Cooper, Bryn Mawr, PA, USA. | No published report identified.                                                                                                                                                  |
| <b>CSR 04</b>                 | A double-blind study comparing the safety and efficacy of diclofenac potassium, aspirin, or placebo in the treatment of moderate or severe pain secondary to dental impaction surgery. Report date February 11 1991. Lead investigator DR Mehlisch, Austin, Tx, USA.  | Mehlisch DR, Brown P. Single-dose therapy with diclofenac potassium, aspirin or placebo following dental impaction surgery. Today's Therapeutic Trends 1995;12(Suppl 1): 15–31.  |
| <b>CSR 05</b>                 | The comparative efficacy of diclofenac potassium, aspirin, or placebo in the treatment of post-episiotomy pain. Report date March 7 1990.                                                                                                                             | Olson NZ, Sunshine A, Zigelboim I, DeCastro A. Onset and duration of analgesia of diclofenac                                                                                     |

|               |                                                                                                                                                                                                                                                                                                                              |                                                                                                                                                                                                                                                                                                                                          |
|---------------|------------------------------------------------------------------------------------------------------------------------------------------------------------------------------------------------------------------------------------------------------------------------------------------------------------------------------|------------------------------------------------------------------------------------------------------------------------------------------------------------------------------------------------------------------------------------------------------------------------------------------------------------------------------------------|
| <b>CSR 06</b> | <p>Lead investigator A Sunshine, I Zigelboim. New Yrk, NY and Caracas, Venezuela.</p> <p>The comparative efficacy of diclofenac potassium, aspirin, and placebo in the treatment of pain secondary to gynaecological surgery. Report date June 4 1990.</p> <p>Lead investigator R Herbertson, Salt Lake City, Utah, USA.</p> | <p>potassium in the treatment of postepisiotomy pain. American Journal of Therapeutics 1997;4:239–46.</p> <p>Herbertson RM, Storey N. The comparative efficacy of diclofenac potassium, aspirin and placebo in the treatment of patients with pain following gynecologic surgery. Today's Therapeutic Trends 1995;12(Suppl 1):33–45.</p> |
| <b>CSR 07</b> | <p>The comparative efficacy of diclofenac potassium, aspirin, and placebo in the treatment of post-gynaecological surgery pain. Report date February 11 1991.</p> <p>Lead investigator G Wideman, Birmingham, Alabama, USA.</p>                                                                                              | <p>No published report identified.</p>                                                                                                                                                                                                                                                                                                   |
| <b>CSR 10</b> | <p>A double-blind, comparative study of diclofenac potassium vs. naproxen sodium vs placebo in the treatment of primary dysmenorrhea. Report date May 6 1991.</p> <p>Lead investigator J Benz – multicentre study with US investigators)</p>                                                                                 | <p>No published report identified.</p>                                                                                                                                                                                                                                                                                                   |
| <b>CSR 11</b> | <p>A double-blind, comparative study of diclofenac potassium (with and without a loading dose) vs. naproxen sodium vs placebo in the treatment of primary dysmenorrhea. Report date May 6 1991.</p> <p>Lead investigator R Anderson – multicentre study with US investigators).</p>                                          | <p>Kintigh JW. A multicenter, randomized, double-blind, placebo controlled study of diclofenac potassium versus naproxen sodium in the treatment of primary dysmenorrhea. Today's</p>                                                                                                                                                    |

CSR = clinical study report

## Appendix 2: CSRs and matching with published reports

| Individual studies            | Dates of trial and report    | Number of patients | Age (years $\pm$ SD)          | Sex distribution | Initial pain intensity     |
|-------------------------------|------------------------------|--------------------|-------------------------------|------------------|----------------------------|
| <b>Dental studies</b>         |                              |                    |                               |                  |                            |
| CSR 02                        | 1988<br>Report 1991          | 255                | 25.4 $\pm$ 6.6<br>Range 16-57 | 51% F<br>49% M   | 90% moderate<br>10% severe |
| Nelson 1994<br>[49]           | 1994                         | 255                | 25                            | 51% F<br>49% M   | 90% moderate<br>10% severe |
| CSR 03                        | 1988<br>Report 1990 and 1991 | 56                 | 22.8 $\pm$ 4.7<br>Range 16-35 | 62% F<br>38% M   | 57% moderate<br>43% severe |
| No identified publication     |                              |                    |                               |                  |                            |
| CSR 04                        | 1988<br>Report 1989 and 1991 | 208                | 25.7 $\pm$ 6.9<br>Range 16-70 | 56% F<br>44% M   | 72% moderate<br>28% severe |
| Mehlish 1995<br>[33]          | 1995                         | 208                | 25.7<br>Range 16-70           | 56% F<br>44% M   | 72% moderate<br>28% severe |
| <b>Gynaecological studies</b> |                              |                    |                               |                  |                            |
| CSR 05                        | 1989<br>Report 1990          | 255                | 23.9 $\pm$ 5.2<br>Range 18-46 | 100% F           | 0% moderate<br>100% severe |
| Olson 1997<br>[51]            | 1997                         | 255                | 23.9                          | 100% F           | 0% moderate<br>100% severe |
| CSR 06                        | 1989                         | 209                | 43.4 $\pm$ 13.2               | 100% F           | 83% moderate               |

|                              |                              |     |                           |        |                            |
|------------------------------|------------------------------|-----|---------------------------|--------|----------------------------|
|                              | Report 1990                  |     | Range 16-78               |        | 17% severe                 |
| Herbertson 1995<br>[19]      | 1995                         | 209 | 43.4                      | 100% F | 83% moderate<br>17% severe |
| CSR 07                       | 1988<br>Report 1989 and 1991 | 215 | 34.7 ± 9.0<br>Range 18-66 | 100% F | 86% moderate<br>14% severe |
| No identified publication    |                              |     |                           |        |                            |
| <b>Dysmenorrhoea studies</b> |                              |     |                           |        |                            |
| CSR 10                       | 1989-90<br>Report 1991       | 328 | 29.7 ± 6.2<br>Range 16-43 | 100% F | 61% moderate<br>39% severe |
| No identified publication    |                              |     |                           |        |                            |
| CSR 11                       | 1989-90<br>Report 1991       | 383 | 30.3 ± 6.1<br>Range 16-42 | 100% F | 70% moderate<br>30% severe |
| Kintigh 1995<br>[28]         | 1995                         | 382 | 16-42                     | 100% F |                            |

---

CSR = clinical study report

### Appendix 3: Quality score and risk of bias for CSRs and matched publications

| Studies                       | Oxford Quality Score | Random sequence generation (selection bias) | Allocation concealment (selection bias) | Blinding of participants and personnel (performance bias) | Size    | Pages |
|-------------------------------|----------------------|---------------------------------------------|-----------------------------------------|-----------------------------------------------------------|---------|-------|
| <b>Dental studies</b>         |                      |                                             |                                         |                                                           |         |       |
| CSR 02                        | R2, DB2, W1          | Low                                         | Low                                     | Low                                                       | High    | 110   |
| Nelson 1994 [49]              | R1, DB2, W1          | Unclear                                     | Unclear                                 | Low                                                       | High    | 12    |
| CSR 03                        | R2, DB2, W1          | Low                                         | Low                                     | Low                                                       | High    | 251   |
| No identified publication     |                      |                                             |                                         |                                                           |         |       |
| CSR 04                        | R2, DB2, W1          | Low                                         | Low                                     | Low                                                       | High    | 204   |
| Mehlish 1995 [33]             | R1, DB2, W1          | Unclear                                     | Unclear                                 | Low                                                       | High    | 17    |
| <b>Gynaecological studies</b> |                      |                                             |                                         |                                                           |         |       |
| CSR 05                        | R2, DB2, W1          | Low                                         | Low                                     | Low                                                       | High    | 74    |
| Olson 1997 [51]               | R1, DB2, W1          | Unclear                                     | Unclear                                 | Low                                                       | High    | 8     |
| CSR 06                        | R2, DB2, W1          | Low                                         | Low                                     | Low                                                       | Unclear | 84    |
| Herbertson 1995 [19]          | R1, DB1, W1          | Unclear                                     | Unclear                                 | Unclear                                                   | Unclear | 13    |

|                              |             |         |         |     |         |     |
|------------------------------|-------------|---------|---------|-----|---------|-----|
| CSR 07                       | R2, DB2, W1 | Low     | Low     | Low | High    | 87  |
| No identified publication    |             |         |         |     |         |     |
| <b>Dysmenorrhoea studies</b> |             |         |         |     |         |     |
| CSR 10                       | R2, DB2, W1 | Low     | Low     | Low | Unclear | 263 |
| No identified publication    |             |         |         |     |         |     |
| CSR 11                       | R2, DB2, W1 | Low     | Low     | Low | Unclear | 378 |
| Kintigh 1995 [28]            | R1, DB2, W1 | Unclear | Unclear | Low | Unclear | 15  |

---

The Oxford Quality score is based on randomisation (0, 1, or 2 points), double blinding (0, 1, or 2 points), and withdrawals (0 or 1 point). CSR = clinical study report; R = randomisation; DB = double blinding; W = withdrawals.





|                                                            |                                                                                                         |                                                                                                                                                                                                                                                                                                               |                                                                                                                                                                                                                                                                                                                                                                                   |                                                                 |                                                                                                                                 |                                                                                                                                  |                                                                                                                                                            |                                                                                                        |                                                                                                                                           |           |                                                           |                                                                                                                                                                                                                                 |                                                    |
|------------------------------------------------------------|---------------------------------------------------------------------------------------------------------|---------------------------------------------------------------------------------------------------------------------------------------------------------------------------------------------------------------------------------------------------------------------------------------------------------------|-----------------------------------------------------------------------------------------------------------------------------------------------------------------------------------------------------------------------------------------------------------------------------------------------------------------------------------------------------------------------------------|-----------------------------------------------------------------|---------------------------------------------------------------------------------------------------------------------------------|----------------------------------------------------------------------------------------------------------------------------------|------------------------------------------------------------------------------------------------------------------------------------------------------------|--------------------------------------------------------------------------------------------------------|-------------------------------------------------------------------------------------------------------------------------------------------|-----------|-----------------------------------------------------------|---------------------------------------------------------------------------------------------------------------------------------------------------------------------------------------------------------------------------------|----------------------------------------------------|
| <b>CSR 06 Study 1988 Report 1990 Herbertson 1995 [19]</b>  | Moderate to severe pain within 96 hours of gynaecological surgery<br>Age ≥16 years<br>Mean age 43 years | Diclofenac-K 50 mg, n = 53<br>Diclofenac-K 100 mg, n = 53<br>Aspirin 650 mg, n = 54<br>Placebo, n = 54                                                                                                                                                                                                        | Randomised using computer generated sequence of random numbers<br>Double blind, double dummy, with identical appearance of treatments<br>Blind maintained until after trial concluded<br>Pain assessed 0.5, 1, 2, 3, 4, 5, 6, 7, 8 hours<br>Outcomes: standard 4 point PI scale, 5 point PR scale and 5 point patient global assessment scale                                     | R = 2<br>DB = 2<br>W = 1<br>Total = 5/5<br><br>RoB size unclear | TOTPAR 6:<br>DK 50 = 12.3<br>DK 100 = 12.2<br>ASA = 11.7<br>Pbo = 4.1                                                           | DK 50 = 29/52<br>DK 100 = 29/52<br>ASA = 28/53<br>Pbo = 6/52                                                                     | Very good or excellent<br>DK 50 = 28/52<br>DK 100 = 25/52<br>ASA = 23/53<br>Pbo = 6/52                                                                     | DK 50 = 6<br>DK100 = 5.5<br>ASA = 4.5<br>Pbo = 4                                                       | By 8 hours<br>DK 50 = 33/52<br>DK100 = 31/52<br>ASA = 46/53<br>Pbo = 44/52                                                                | Not given | DK 50 = 6/54<br>DK 100 = 6/55<br>ASA = 5/54<br>Pbo = 2/54 | No withdrawals<br>A number of patients were not included in the pain analyses, principally because of rescue required before 1 hour, or vomiting after medicines taken<br>Episiotomy patients not included in efficacy analysis | None reported                                      |
| <b>CSR 07 Study 1988 Report 1990</b>                       | Moderate to severe pain within 96 hours of gynaecological surgery<br>Age ≥16 years<br>Mean age 35 years | Diclofenac-K 50 mg, n = 55<br>Diclofenac-K 100 mg, n = 51<br>Aspirin 650 mg, n = 54<br>Placebo, n = 55                                                                                                                                                                                                        | Randomised using computer generated sequence of random numbers<br>Double blind, double dummy, with identical appearance of treatments<br>Blind maintained until after trial concluded<br>Pain assessed 0.5, 1, 2, 3, 4, 5, 6, 7, 8 hours<br>Outcomes: standard 4 point PI scale, 5 point PR scale and 5 point patient global assessment scale                                     | R = 2<br>DB = 2<br>W = 1<br>Total = 5/5<br><br>RoB size unclear | TOTPAR 6:<br>DK 50 = 11.8<br>DK100 = 10.3<br>ASA = 11.0<br>Pbo = 4.0                                                            | DK 50 = 28/52<br>DK100 = 23/50<br>ASA = 26/53<br>Pbo = 5/52                                                                      | Very good or excellent<br>DK 50 = 29/52<br>DK100 = 19/50<br>ASA = 17/53<br>Pbo = 4/52                                                                      | DK 50 = >8<br>DK100 = 4<br>ASA = 5.5<br>Pbo = 3.9                                                      | By 8 hours<br>DK 50 = 23/52<br>DK100 = 28/50<br>ASA = 39/53<br>Pbo = 48/52                                                                | Not given | DK 50 = 6/55<br>DK100 = 2/51<br>ASA = 9/54<br>Pbo = 5/55  | No withdrawals<br>A number of patients were not included in the pain analyses, principally because of rescue required before 1 hour, or vomiting after medicines taken<br>Episiotomy patients not included in efficacy analysis | None reported                                      |
| <b>Dysmenorrhoea studies CSR 10 Study 1989 Report 1991</b> | Moderate to severe pain associated with menstruation<br>Age 16-40 years<br>Mean age 30 years            | First doses were:<br>Diclofenac-K 100 mg, n = 108<br>Naproxen 550 mg, n = 108<br>Placebo, n = 112<br>Initial dose of 2 tablets (DK 100 mg, Nap 550 mg, placebo), then 1 tablet every 6-8 hours, not exceeding 3 doses in any 24 hour period<br>Three day supply, for two cycles<br>Note: only first dose data | Randomised using computer generated sequence of random numbers<br>Double blind, double dummy, with identical appearance of treatments<br>Blind maintained until after trial concluded<br>Pain assessed 0.5, 1, 2, 3, 4, 5, 6, 7, 8 hours<br>Outcomes: standard 4 point PI scale, 5 point PR scale and 5 point patient global assessment scale, plus dysmenorrhoea symptom scorers | R = 2<br>DB = 2<br>W = 1<br>Total = 5/5<br><br>RoB size unclear | TOTPAR 6:<br>Cycle 1<br>DK 100 = 12.9<br>Nap 550 = 12.9<br>Pbo = 7.8<br>Cycle 2<br>DK 100 = 13.6<br>Nap 550 = 12.7<br>Pbo = 7.4 | Cycle 1<br>DK 100 = 65/109<br>Nap 550 = 65/109<br>Pbo = 36/114<br>Cycle 2<br>DK 100 = 64/100<br>Nap 550 = 59/100<br>Pbo = 31/107 | Very good or excellent<br>Cycle 1<br>DK 100 = 44/108<br>Nap 550 = 52/108<br>Pbo = 17/113<br>Cycle 2<br>DK 100 = 51/100<br>Nap 550 = 43/100<br>Pbo = 19/105 | Cycle 1<br>DK100 = >8<br>Nap 550 = >8<br>Pbo = >8<br>Cycle 2<br>DK100 = >8<br>Nap 550 = >8<br>Pbo = >8 | By 8 hours<br>Cycle 1<br>DK100 = 5/109<br>Nap 550 = 4/109<br>Pbo = 23/114<br>Cycle 2<br>DK 100 = 5/100<br>Nap 550 = 7/100<br>Pbo = 28/107 | Not given | DK100 = 38/109<br>Nap 550 = 37/109<br>Pbo = 32/114        | No withdrawals within first dose                                                                                                                                                                                                | No serious events evident in whole dosing schedule |

|                                              |                                                                                              |                                                                                                                                                                                                                                                                                                                                                         |                                                                                                                                                                                                                                                                                                                                                                                   |                                                                 |                                                                                                                                                                     |                                                                                                                                                                    |                                                                                                                                                                                             |                                                                                                                                        |                                                                                                                                                                          |           |                                                                   |                                  |                                                    |
|----------------------------------------------|----------------------------------------------------------------------------------------------|---------------------------------------------------------------------------------------------------------------------------------------------------------------------------------------------------------------------------------------------------------------------------------------------------------------------------------------------------------|-----------------------------------------------------------------------------------------------------------------------------------------------------------------------------------------------------------------------------------------------------------------------------------------------------------------------------------------------------------------------------------|-----------------------------------------------------------------|---------------------------------------------------------------------------------------------------------------------------------------------------------------------|--------------------------------------------------------------------------------------------------------------------------------------------------------------------|---------------------------------------------------------------------------------------------------------------------------------------------------------------------------------------------|----------------------------------------------------------------------------------------------------------------------------------------|--------------------------------------------------------------------------------------------------------------------------------------------------------------------------|-----------|-------------------------------------------------------------------|----------------------------------|----------------------------------------------------|
| <b>CSR 11<br/>Study 1989<br/>Report 1990</b> | Moderate to severe pain associated with menstruation<br>Age 16-40 years<br>Mean age 30 years | First doses were:<br>Diclofenac-K 100 mg, n = 100<br>Diclofenac-K 500 mg, n = 101<br>Naproxen 275 mg, n = 92<br>Placebo, n = 90<br><br>Initial dose of 2 tablets (DK 100 mg, Nap 550 mg, placebo), then 1 tablet every 6-8 hours, not exceeding 3 doses in any 24 hour period<br><br>Three day supply, for two cycles<br><br>Note: only first dose data | Randomised using computer generated sequence of random numbers<br>Double blind, double dummy, with identical appearance of treatments<br>Blind maintained until after trial concluded<br>Pain assessed 0.5, 1, 2, 3, 4, 5, 6, 7, 8 hours<br>Outcomes: standard 4 point PI scale, 5 point PR scale and 5 point patient global assessment scale, plus dysmenorrhoea symptom scorers | R = 2<br>DB = 2<br>W = 1<br>Total = 5/5<br><br>RoB size unclear | TOTPAR 6:<br>Cycle 1<br>DK 50 = 12.9<br>DK 100 = 14.0<br>Nap 550 = 12.9<br>Pbo = 7.4<br><br>Cycle 2<br>DK 50 = 13.0<br>DK 100 = 13.8<br>Nap 550 = 12.1<br>Pbo = 7.7 | Cycle 1<br>DK 50 = 60/100<br>DK 100 = 67/101<br>Nap 550 = 55/92<br>Pbo = 27/90<br><br>Cycle 2<br>DK 50 = 54/89<br>DK 100 = 62/96<br>Nap 550 = 46/83<br>Pbo = 25/82 | Very good or excellent<br>Cycle 1<br>DK 50 = 50/101<br>DK 100 = 43/98<br>Nap 550 = 27/91<br>Pbo = 13/89<br><br>Cycle 2<br>DK 50 = 46/96<br>DK 100 = 46/89<br>Nap 550 = 30/83<br>Pbo = 21/82 | Cycle 1<br>DK 50 = >8<br>DK 100 = >8<br>Nap 550 = >8<br>Pbo = >8<br><br>Cycle 2<br>DK50 = >8<br>DK100 = >8<br>Nap 550 = >8<br>Pbo = >8 | By 8 hours<br>Cycle 1<br>DK 50 = 3/101<br>DK100 = 1/100<br>Nap 550 = 3/92<br>Pbo = 17/90<br><br>Cycle 2<br>DK 50 = 2/96<br>DK100 = 0/89<br>Nap 550 = 2/83<br>Pbo = 12/82 | Not given | DK50 = 49/101<br>DK100 = 42/100<br>Nap 550 = 43/92<br>Pbo = 43/90 | No withdrawals within first dose | No serious events evident in whole dosing schedule |
|----------------------------------------------|----------------------------------------------------------------------------------------------|---------------------------------------------------------------------------------------------------------------------------------------------------------------------------------------------------------------------------------------------------------------------------------------------------------------------------------------------------------|-----------------------------------------------------------------------------------------------------------------------------------------------------------------------------------------------------------------------------------------------------------------------------------------------------------------------------------------------------------------------------------|-----------------------------------------------------------------|---------------------------------------------------------------------------------------------------------------------------------------------------------------------|--------------------------------------------------------------------------------------------------------------------------------------------------------------------|---------------------------------------------------------------------------------------------------------------------------------------------------------------------------------------------|----------------------------------------------------------------------------------------------------------------------------------------|--------------------------------------------------------------------------------------------------------------------------------------------------------------------------|-----------|-------------------------------------------------------------------|----------------------------------|----------------------------------------------------|

The Oxford Quality score is based on randomisation (0, 1, or 2 points), double blinding (0, 1, or 2 points), and withdrawals (0 or 1 point). ASA, aspirin; CSR = clinical study report; DB = double blinding; DK = diclofenac potassium; Nap = naproxen; Pbo = placebo; R = randomisation; W = withdrawals.
